# Supplementary figures and images for: Zeolitic imidazolate framework-8 modified magnetic halloysite nanotube-based solid phase extraction for the analysis of carbamate pesticides by ultra-high performance liquid chromatography tandem mass spectrometry
Source: Royal Society of Chemistry journal article supplement (doi:10.1039/d2ay01228f), 2022-01-01

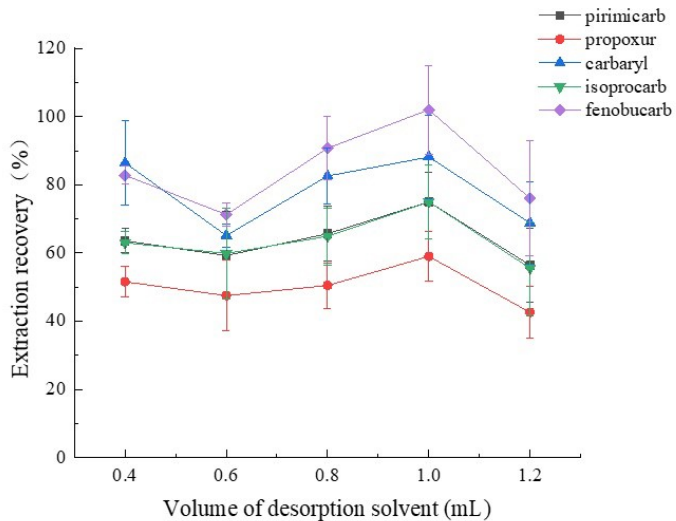

Supplement: d2ay01228f3.pdf [file d2ay01228f3.pdf]
